# ANESTHESIOLOGY

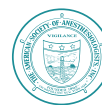

## Seeing Analgesia during General Anesthesia: Three Ways

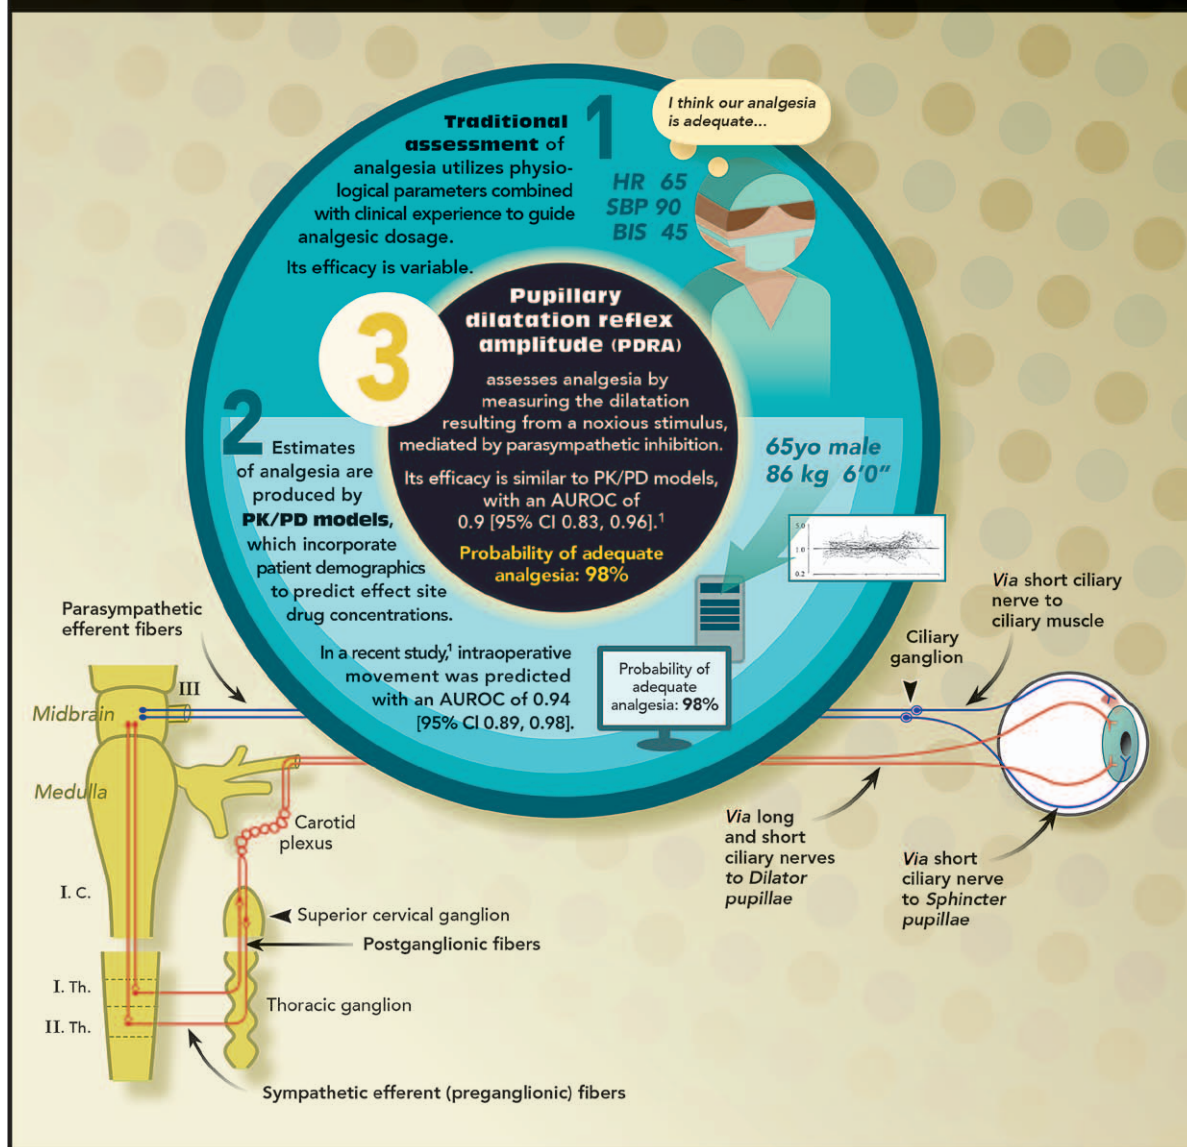

AUROC = area under the receiver operating characteristic curve; BIS = bispectral index; CI = confidence interval; HR = heart rate; PK/PD = pharmacokinetic-pharmacodynamic; SBP = systolic blood pressure.

Infographic created by Jonathan P. Wanderer, Vanderbilt University School of Medicine, and James P. Rathmell, Massachusetts General Hospital/Harvard Medical School. Illustration by Annemarie Johnson, Vivo Visuals. Dr. Wanderer is funded by the Foundation for Anesthesia Education and Research, Rochester, Minnesota, and Anesthesia Quality Institute's Mentored Research Training Grant - Health Services Research, Schaumburg, Illinois. Address correspondence to Dr. Wanderer: jon.wanderer@vanderbilt.edu.

1. Guglielminotti J, Grillo N, Paule M, Mentré F, Servin F, Montravers P, Longrois D: Prediction of movement to surgical stimulation by the pupillary dilatation reflex amplitude evoked by a standardized noxious test. *ANESTHESIOLOGY* 2015; 122:985-93
